# Supplementary material for: Association between breastfeeding and eczema during childhood and adolescence: A cohort study
Source: PubMed Central journal article supplement (PMC5612686; doi:10.1371/journal.pone.0185066), 2017-09-25

**S1 Fig. Age range of children from Leicester Respiratory Cohorts who participated in each survey**

(Restricted to 5,676 children remaining in the analysis)

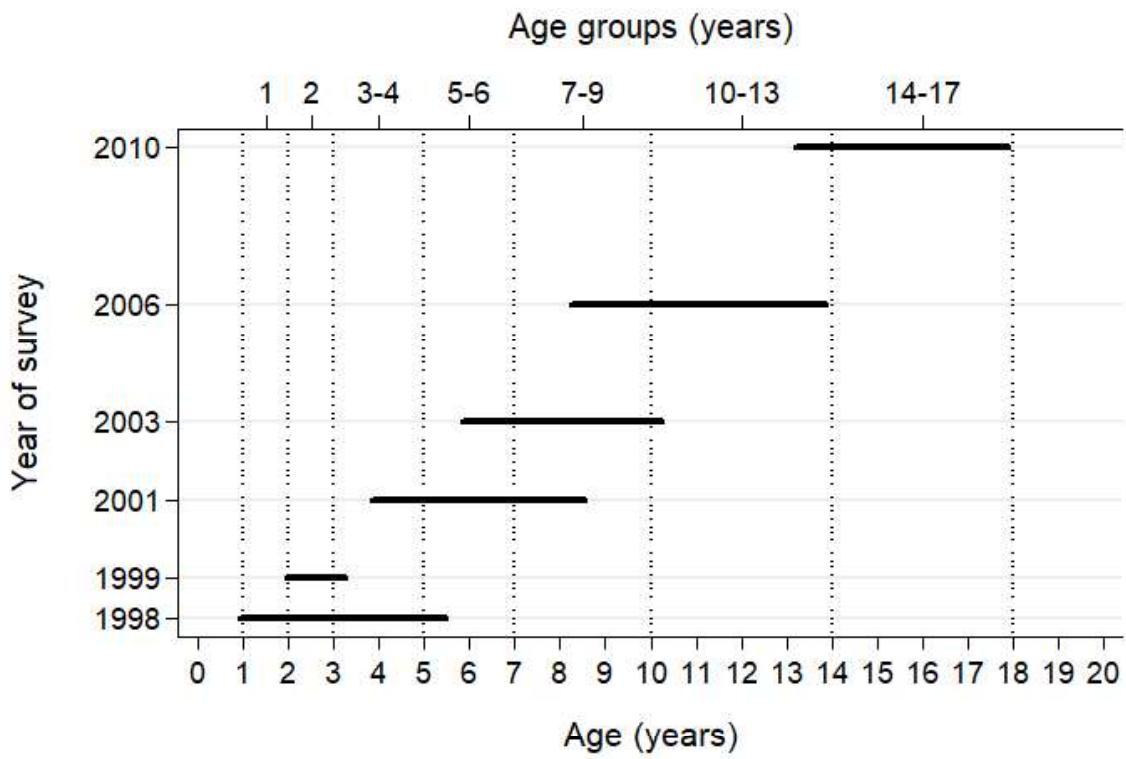

Supplement: pone.0185066.s001.pdf [file pone.0185066.s001.pdf]
