# Supplementary material for: Association between breastfeeding and eczema during childhood and adolescence: A cohort study
Source: PubMed Central journal article supplement (PMC5612686; doi:10.1371/journal.pone.0185066), 2017-09-25

S2 Fig. Directed acyclic graph (DAG)

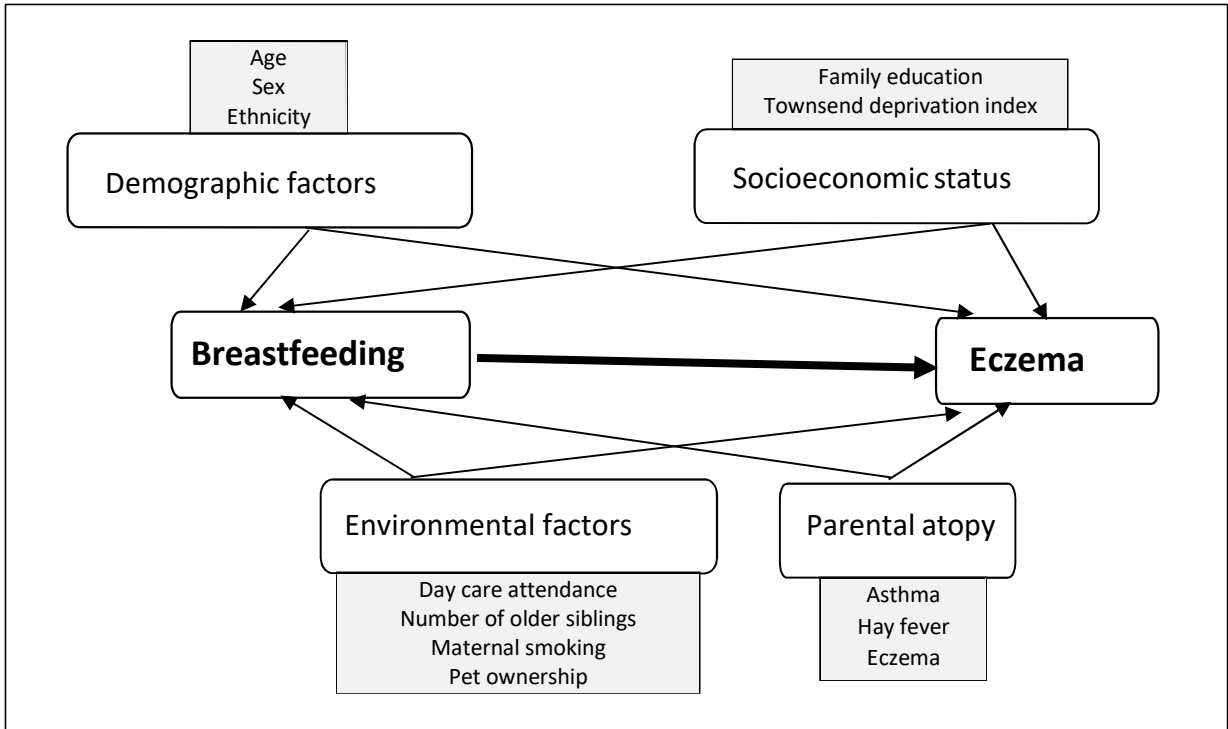

Supplement: pone.0185066.s002.pdf [file pone.0185066.s002.pdf]
