# Supplementary material for: Association between breastfeeding and eczema during childhood and adolescence: A cohort study
Source: PubMed Central journal article supplement (PMC5612686; doi:10.1371/journal.pone.0185066), 2017-09-25

**S3 Fig. Flow diagram of study children**

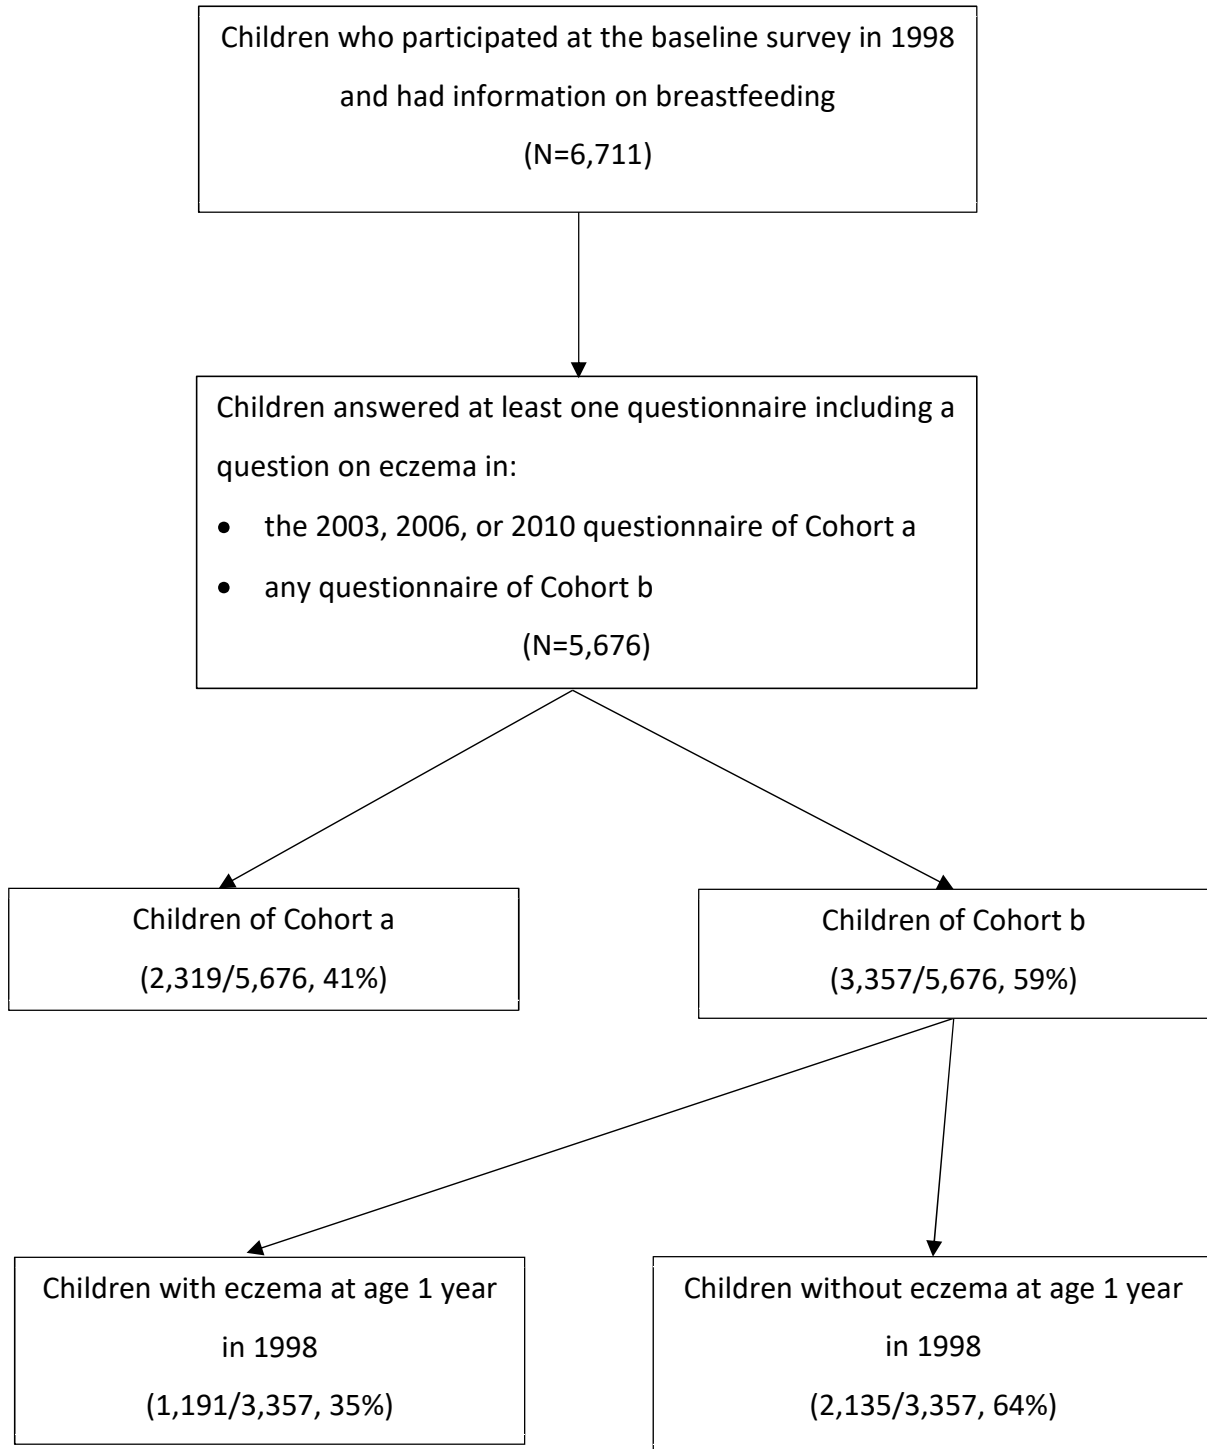

Supplement: pone.0185066.s003.pdf [file pone.0185066.s003.pdf]
