# Supplementary material for: Association between breastfeeding and eczema during childhood and adolescence: A cohort study
Source: PubMed Central journal article supplement (PMC5612686; doi:10.1371/journal.pone.0185066), 2017-09-25
Supplement: pone.0185066.s005.pdf [file pone.0185066.s005.pdf]

**S1 Table. Age in 1998 and summary of eczema questions asked in different surveys**

| <b>Participating cohorts</b> |                                                   |                                                   |
|------------------------------|---------------------------------------------------|---------------------------------------------------|
|                              | <b>Cohort a</b>                                   | <b>Cohort b</b>                                   |
| <b>Age in 1998</b>           | 1-4 years                                         | 1 year                                            |
| <b>Surveys</b>               | <b>Questions on eczema</b>                        |                                                   |
| 1998                         | No question on eczema                             | In the past 12 months, has your child had eczema? |
| 1999                         | No survey                                         | In the past 12 months, has your child had eczema? |
| 2001                         | No question on eczema                             | In the past 12 months, has your child had eczema? |
| 2003                         | In the past 12 months, has your child had eczema? | In the past 12 months, has your child had eczema? |
| 2006                         | In the past 12 months, has your child had eczema? | In the past 12 months, has your child had eczema? |
| 2010                         | Have you had eczema in the last 12 months?        | Have you had eczema in the last 12 months?        |
