# Supplementary material for: Association between breastfeeding and eczema during childhood and adolescence: A cohort study
Source: PubMed Central journal article supplement (PMC5612686; doi:10.1371/journal.pone.0185066), 2017-09-25
Supplement: pone.0185066.s006.pdf [file pone.0185066.s006.pdf]

**S2 Table. Characteristics of participants and dropouts at baseline survey**

|                                                                 |                    | Participants<br>N=5,676<br>n (%) | Dropouts <sup>a</sup><br>N=1,035<br>n (%) | p-value <sup>b</sup> |
|-----------------------------------------------------------------|--------------------|----------------------------------|-------------------------------------------|----------------------|
| <b>Demographic factors</b>                                      |                    |                                  |                                           |                      |
| Age (years)                                                     |                    |                                  |                                           | <b>&lt;0.001</b>     |
|                                                                 | 1                  | 3,788 (67)                       | 266 (26)                                  |                      |
|                                                                 | 2                  | 683 (12)                         | 248 (24)                                  |                      |
|                                                                 | 3                  | 596 (11)                         | 256 (25)                                  |                      |
|                                                                 | 4                  | 609 (11)                         | 265 (26)                                  |                      |
| Sex                                                             |                    |                                  |                                           | 0.321                |
|                                                                 | Female             | 2,733 (48)                       | 481 (46)                                  |                      |
|                                                                 | Male               | 2,943 (52)                       | 554 (54)                                  |                      |
| Ethnicity                                                       |                    |                                  |                                           | <b>&lt;0.001</b>     |
|                                                                 | Whites             | 4,333 (76)                       | 606 (59)                                  |                      |
|                                                                 | South Asian        | 1,343 (24)                       | 429 (41)                                  |                      |
| <b>Breastfeeding</b>                                            |                    |                                  |                                           |                      |
|                                                                 | Never              | 2,284 (40)                       | 470 (45)                                  | <b>0.002</b>         |
|                                                                 | 0-3 months         | 1,610 (28)                       | 310 (30)                                  |                      |
|                                                                 | 4-6 months         | 705 (12)                         | 111 (11)                                  |                      |
|                                                                 | >6 months          | 1,077 (19)                       | 144 (14)                                  |                      |
| <b>Socioeconomic status</b>                                     |                    |                                  |                                           |                      |
| Townsend deprivation index <sup>c</sup>                         |                    |                                  |                                           | <b>&lt;0.001</b>     |
|                                                                 | Deprived (Index>0) | 2,617 (46)                       | 602 (58)                                  |                      |
| Family education <sup>d</sup>                                   |                    |                                  |                                           | <b>0.035</b>         |
|                                                                 | High               | 2,426 (43)                       | 397 (38)                                  |                      |
| <b>Environmental exposures</b>                                  |                    |                                  |                                           |                      |
| Day care attendance                                             |                    | 2,330 (41)                       | 615 (59)                                  | <b>&lt;0.001</b>     |
| Number of older siblings                                        |                    |                                  |                                           | 0.282                |
|                                                                 | 0                  | 2,347 (41)                       | 409 (40)                                  |                      |
|                                                                 | 1 or 2             | 2,895 (51)                       | 511 (49)                                  |                      |
|                                                                 | >=3                | 424 (7)                          | 112 (11)                                  |                      |
| Mother smoked during pregnancy                                  |                    | 865 (15)                         | 199 (19)                                  | <b>0.001</b>         |
| Mother smokes currently                                         |                    | 1,115 (20)                       | 220 (21)                                  | 0.232                |
| Pet (dog/cat/bird) ownership                                    |                    | 2,174 (38)                       | 333 (32)                                  | <b>&lt;0.001</b>     |
| <b>Parental history of atopy (asthma, eczema, or hay fever)</b> |                    |                                  |                                           |                      |
| Maternal atopy                                                  |                    | 2,519 (44)                       | 431 (42)                                  | 0.103                |
| Paternal atopy                                                  |                    | 2,108 (37)                       | 363 (35)                                  | 0.205                |
| <b>Parental history of eczema</b>                               |                    |                                  |                                           |                      |
| Maternal eczema                                                 |                    | 1,270 (22)                       | 227 (22)                                  | 0.753                |
| Paternal eczema                                                 |                    | 707 (12)                         | 121 (12)                                  | 0.491                |

<sup>a</sup> Children who participated at the baseline survey in 1998 and had information on breastfeeding, but did not answer to eczema question in any survey.

<sup>b</sup> P-value of Chi-square test, to evaluate the differences between participants and dropouts.

<sup>c</sup> An area-based deprivation score; higher values indicate greater deprivation.

<sup>d</sup> Parents (either father or mother) who completed their full-time education older than age of 16.
