# Supplementary material for: Association between breastfeeding and eczema during childhood and adolescence: A cohort study
Source: PubMed Central journal article supplement (PMC5612686; doi:10.1371/journal.pone.0185066), 2017-09-25
Supplement: pone.0185066.s007.pdf [file pone.0185066.s007.pdf]

**S3 Table. Prevalence of current eczema at different age groups by breastfeeding status**

| Age groups (years) | Total                      |                        |            |               | Breastfeeding (Yes)        |                        |            |               | Breastfeeding (No)         |                        |            |               | p <sup>a</sup> |
|--------------------|----------------------------|------------------------|------------|---------------|----------------------------|------------------------|------------|---------------|----------------------------|------------------------|------------|---------------|----------------|
|                    | Number of participants (N) | Current eczema (yes) n | % (95% CI) | Missing n (%) | Number of participants (N) | Current eczema (yes) n | % (95% CI) | Missing n (%) | Number of participants (N) | Current eczema (yes) n | % (95% CI) | Missing n (%) |                |
| 1                  | 3,235                      | 1,156                  | 36 (34-37) | 31 (1)        | 1,889                      | 677                    | 36 (34-38) | 17 (1)        | 1,346                      | 479                    | 36 (33-38) | 14 (1)        | 0.9059         |
| 2                  | 2,319                      | 814                    | 35 (33-37) | 121 (5)       | 1,427                      | 508                    | 36 (33-38) | 76 (5)        | 892                        | 306                    | 34 (31-37) | 45 (5)        | 0.4861         |
| 3-4                | 1,703                      | 470                    | 28 (26-30) | 117 (7)       | 1,070                      | 319                    | 30 (27-33) | 63 (6)        | 633                        | 151                    | 24 (21-27) | 54 (9)        | 0.0187         |
| 5-6                | 2,562                      | 688                    | 27 (25-29) | 134 (5)       | 1,627                      | 442                    | 27 (25-29) | 79 (5)        | 935                        | 246                    | 26 (24-29) | 55 (6)        | 0.7531         |
| 7-9                | 2,669                      | 654                    | 25 (23-26) | 42 (2)        | 1,674                      | 407                    | 24 (22-26) | 26 (2)        | 995                        | 247                    | 25 (22-28) | 16 (2)        | 0.7599         |
| 10-13              | 1,945                      | 352                    | 18 (16-20) | 24 (1)        | 1,259                      | 228                    | 18 (16-20) | 14 (1)        | 684                        | 124                    | 18 (15-21) | 10 (1)        | 0.9636         |
| 14-17              | 1,811                      | 330                    | 18 (17-20) | 10 (1)        | 1,188                      | 214                    | 18 (16-20) | 7 (1)         | 623                        | 116                    | 19 (16-22) | 3 (0)         | 0.7190         |

<sup>a</sup> P-value of Chi-square test of independence to determine whether the association with current eczema between children who had been breastfed and those who had not been breastfed is significant.
