# Supplementary material for: Association between breastfeeding and eczema during childhood and adolescence: A cohort study
Source: PubMed Central journal article supplement (PMC5612686; doi:10.1371/journal.pone.0185066), 2017-09-25
Supplement: pone.0185066.s008.pdf [file pone.0185066.s008.pdf]

**S4 Table. Association between breastfeeding duration and prevalence of current eczema during childhood and adolescence---restricted to children with complete information on all the confounders**

| <b>Overall association between breastfeeding and current eczema</b> |                                   |         |                                             |         |
|---------------------------------------------------------------------|-----------------------------------|---------|---------------------------------------------|---------|
| Breastfeeding duration                                              | <b>Unadjusted model (N=5,456)</b> |         | <b>Adjusted<sup>a</sup> model (N=5,456)</b> |         |
|                                                                     | OR (95% CI)                       | p-value | OR (95% CI)                                 | p-value |
| No breastfeeding                                                    | 1.00                              | -       | 1.00                                        | -       |
| 0-3 months                                                          | 1.04 (0.92-1.17)                  | 0.564   | 1.02 (0.90-1.15)                            | 0.802   |
| 4-6 months                                                          | 1.02 (0.88-1.20)                  | 0.770   | 0.97 (0.82-1.13)                            | 0.668   |
| >6 months                                                           | 0.99 (0.86-1.13)                  | 0.842   | 0.98 (0.85-1.14)                            | 0.827   |

Data are presented as odds ratios (ORs) with their 95% confidence intervals (CIs) and associated p-values, both for unadjusted and adjusted GEE models.

The baseline group consisted of children who had not been breastfed.

<sup>a</sup> Adjusted for age, sex, ethnicity, family education, Townsend deprivation index, day care attendance, number of older siblings, pet ownership (dog, cat, or bird), pre- and postnatal maternal smoking and parental atopy (defined as paternal or maternal history of asthma, hay fever, or eczema).
