# Supplementary material for: Association between breastfeeding and eczema during childhood and adolescence: A cohort study
Source: PubMed Central journal article supplement (PMC5612686; doi:10.1371/journal.pone.0185066), 2017-09-25
Supplement: pone.0185066.s009.pdf [file pone.0185066.s009.pdf]

**S5 Table. Association between breastfeeding duration and current eczema at different age groups**

| <b>Unadjusted logistic regression models</b>           |                          |         |                          |         |                            |         |                            |         |                            |         |                              |         |                              |         |
|--------------------------------------------------------|--------------------------|---------|--------------------------|---------|----------------------------|---------|----------------------------|---------|----------------------------|---------|------------------------------|---------|------------------------------|---------|
| <b>Breastfeeding</b>                                   | <b>Age 1<br/>n=3,204</b> |         | <b>Age 2<br/>n=2,198</b> |         | <b>Age 3-4<br/>n=1,586</b> |         | <b>Age 5-6<br/>n=2,428</b> |         | <b>Age 7-9<br/>n=2,627</b> |         | <b>Age 10-13<br/>n=1,919</b> |         | <b>Age 14-17<br/>n=1,801</b> |         |
|                                                        | OR (95% CI)              | p-value | OR (95% CI)              | p-value | OR (95% CI)                | p-value | OR (95% CI)                | p-value | OR (95% CI)                | p-value | OR (95% CI)                  | p-value | OR (95% CI)                  | p-value |
| No breastfeeding                                       | 1.00                     | -       | 1.00                     | -       | 1.00                       | -       | 1.00                       | -       | 1.00                       | -       | 1.00                         | -       | 1.00                         | -       |
| 0-3 months                                             | 1.05 (0.88-1.26)         | 0.563   | 1.03 (0.83-1.28)         | 0.777   | 1.26 (0.96-1.66)           | 0.090   | 1.10 (0.89-1.37)           | 0.386   | 0.93 (0.74-1.16)           | 0.511   | 1.05 (0.79-1.40)             | 0.722   | 0.88 (0.65-1.20)             | 0.427   |
| 4-6 months                                             | 1.04 (0.83-1.32)         | 0.723   | 1.15 (0.87-1.51)         | 0.320   | 1.53 (1.10-2.13)           | 0.011   | 0.90 (0.67-1.20)           | 0.466   | 1.05 (0.80-1.38)           | 0.745   | 0.91 (0.62-1.33)             | 0.616   | 1.21 (0.84-1.74)             | 0.315   |
| >6 months                                              | 0.92 (0.75-1.13)         | 0.430   | 1.06 (0.84-1.34)         | 0.634   | 1.24 (0.92-1.68)           | 0.158   | 1.02 (0.80-1.30)           | 0.876   | 0.98 (0.77-1.25)           | 0.890   | 0.97 (0.71-1.33)             | 0.850   | 0.92 (0.67-1.27)             | 0.630   |
| <b>Adjusted<sup>a</sup> logistic regression models</b> |                          |         |                          |         |                            |         |                            |         |                            |         |                              |         |                              |         |
| <b>Breastfeeding</b>                                   | <b>Age 1<br/>n=3,100</b> |         | <b>Age 2<br/>n=2,141</b> |         | <b>Age 3-4<br/>n=1,547</b> |         | <b>Age 5-6<br/>n=2,356</b> |         | <b>Age 7-9<br/>n=2,530</b> |         | <b>Age 10-13<br/>n=1,862</b> |         | <b>Age 14-17<br/>n=1,739</b> |         |
|                                                        | OR (95% CI)              | p-value | OR (95% CI)              | p-value | OR (95% CI)                | p-value | OR (95% CI)                | p-value | OR (95% CI)                | p-value | OR (95% CI)                  | p-value | OR (95% CI)                  | p-value |
| No breastfeeding                                       | 1.00                     | -       | 1.00                     | -       | 1.00                       | -       | 1.00                       | -       | 1.00                       | -       | 1.00                         | -       | 1.00                         | -       |
| 0-3 months                                             | 1.01 (0.83-1.22)         | 0.914   | 1.08 (0.86-1.37)         | 0.515   | 1.30 (0.97-1.74)           | 0.082   | 1.03 (0.82-1.30)           | 0.808   | 0.89 (0.70-1.13)           | 0.332   | 0.90 (0.67-1.23)             | 0.516   | 0.92 (0.66-1.28)             | 0.605   |
| 4-6 months                                             | 0.97 (0.75-1.25)         | 0.810   | 1.12 (0.83-1.51)         | 0.455   | 1.53 (1.07-2.19)           | 0.021   | 0.84 (0.62-1.14)           | 0.254   | 0.94 (0.70-1.26)           | 0.658   | 0.76 (0.51-1.13)             | 0.179   | 1.17 (0.79-1.73)             | 0.446   |
| >6 months                                              | 0.92 (0.72-1.14)         | 0.384   | 1.12 (0.86-1.46)         | 0.396   | 1.23 (0.88-1.71)           | 0.226   | 0.95 (0.73-1.23)           | 0.704   | 0.93 (0.71-1.20)           | 0.568   | 0.86 (0.61-1.20)             | 0.370   | 0.92 (0.65-1.31)             | 0.646   |

Data are presented as odds ratios (ORs) with their 95% confidence intervals (CIs) and associated p-values for both unadjusted and adjusted logistic regression models.

The baseline group consisted of children who had not been breastfed.

<sup>a</sup> Adjusted for sex, ethnicity, Townsend deprivation index, family education, day care attendance, number of older siblings, pre- and post-natal maternal smoking, pet ownership (dog, cat, or bird), and parental atopy (defined as paternal or maternal history of asthma, hay fever, or eczema).
