# Supplementary material for: Association between breastfeeding and eczema during childhood and adolescence: A cohort study
Source: PubMed Central journal article supplement (PMC5612686; doi:10.1371/journal.pone.0185066), 2017-09-25
Supplement: pone.0185066.s011.pdf [file pone.0185066.s011.pdf]

**S7 Table. Associations between breastfeeding duration and incident eczema at ages 2, 4, and 6 years--restricted to children with complete information on all the confounders**

| <b>At age 2 years (1999 survey)</b> |                             |         |                                       |         |
|-------------------------------------|-----------------------------|---------|---------------------------------------|---------|
| Breastfeeding duration              | <b>Unadjusted (n=1,373)</b> |         | <b>Adjusted<sup>a</sup> (n=1,373)</b> |         |
|                                     | OR (95% CI)                 | p-value | OR (95% CI)                           | p-value |
| No breastfeeding                    | 1.00                        | -       | 1.00                                  | -       |
| 0-3 months                          | 1.04 (0.72-1.49)            | 0.848   | 1.14 (0.78-1.66)                      | 0.487   |
| 4-6 months                          | 1.14 (0.73-1.80)            | 0.562   | 1.16 (0.72-1.87)                      | 0.542   |
| >6 months                           | 1.29 (0.89-1.87)            | 0.195   | 1.48 (0.99-2.21)                      | 0.053   |
| <b>At age 4 years (2001 survey)</b> |                             |         |                                       |         |
| Breastfeeding duration              | <b>Unadjusted (n=1,315)</b> |         | <b>Adjusted<sup>a</sup> (n=1,315)</b> |         |
|                                     | OR (95% CI)                 | p-value | OR (95% CI)                           | p-value |
| No breastfeeding                    | 1.00                        | -       | 1.00                                  | -       |
| 0-3 months                          | 0.99 (0.67-1.46)            | 0.962   | 1.01 (0.67-1.52)                      | 0.947   |
| 4-6 months                          | 1.30 (0.82-2.08)            | 0.267   | 1.29 (0.79-2.12)                      | 0.305   |
| >6 months                           | 1.19 (0.79-1.81)            | 0.406   | 1.24 (0.80-1.93)                      | 0.343   |
| <b>At age 6 years (2003 survey)</b> |                             |         |                                       |         |
| Breastfeeding duration              | <b>Unadjusted (n=1,104)</b> |         | <b>Adjusted<sup>a</sup> (n=1,104)</b> |         |
|                                     | OR (95% CI)                 | p-value | OR (95% CI)                           | p-value |
| No breastfeeding                    | 1.00                        | -       | 1.00                                  | -       |
| 0-3 months                          | 0.93 (0.63-1.36)            | 0.702   | 0.96 (0.64-1.43)                      | 0.826   |
| 4-6 months                          | 0.80 (0.47-1.36)            | 0.404   | 0.85 (0.49-1.48)                      | 0.568   |
| >6 months                           | 0.86 (0.56-1.33)            | 0.505   | 0.84 (0.53-1.31)                      | 0.440   |

Data are presented as odds ratios (ORs) with their 95% confidence intervals (CIs) and associated p-values, both in unadjusted and adjusted logistic regression models.

The baseline group consisted of children who had not been breastfed.

<sup>a</sup> Adjusted for sex, ethnicity, family education, Townsend deprivation index, day care attendance, number of older siblings, pet ownership (dog, cat, or bird), pre- and postnatal maternal smoking, and parental atopy (defined as paternal or maternal history of asthma, hay fever, or eczema).
