# Supplementary material for: Association between breastfeeding and eczema during childhood and adolescence: A cohort study
Source: PubMed Central journal article supplement (PMC5612686; doi:10.1371/journal.pone.0185066), 2017-09-25
Supplement: pone.0185066.s012.pdf [file pone.0185066.s012.pdf]

**S8 Table. Association between breastfeeding duration and recurrent eczema**

| Breastfeeding    | Unadjusted (n=2,983) |         | Adjusted <sup>a</sup> (n=2,895) |         |
|------------------|----------------------|---------|---------------------------------|---------|
|                  | OR (95% CI)          | p-value | OR (95% CI)                     | p-value |
| No breastfeeding | 1.00                 | -       | 1.00                            | -       |
| 0-3 months       | 1.08 (0.89-1.30)     | 0.443   | 1.04 (0.84-1.27)                | 0.736   |
| 4-6 months       | 1.24 (0.97-1.58)     | 0.082   | 1.11 (0.85-1.45)                | 0.437   |
| >6 months        | 1.07 (0.86-1.33)     | 0.531   | 0.98 (0.77-1.24)                | 0.857   |

Data are presented as odds ratios (ORs) with their 95% confidence intervals (CIs) and associated p-values for both unadjusted and adjusted logistic regression models.

The baseline group consisted of children who had not been breastfed.

<sup>a</sup> Adjusted for age, sex, ethnicity, Townsend deprivation index, family education, day care attendance, number of older siblings, pre- and post-natal maternal smoking, pet ownership, and parental atopy (defined as paternal or maternal history of asthma, hay fever, or eczema).
