# Supplementary material for: Association between breastfeeding and eczema during childhood and adolescence: A cohort study
Source: PubMed Central journal article supplement (PMC5612686; doi:10.1371/journal.pone.0185066), 2017-09-25
Supplement: pone.0185066.s013.pdf [file pone.0185066.s013.pdf]

**S9 Table. Level of agreement of responses for children with and without eczema who provided breastfeeding responses (yes/no) at baseline survey and in subsequent questionnaires**

(3-month interval, 1-year-old children, n=463)

|                                     | ++  | +- | -+ | --  | Total | k    |
|-------------------------------------|-----|----|----|-----|-------|------|
| <b>Breastfeeding</b>                |     |    |    |     |       |      |
| Children with eczema at baseline    | 105 | 1  | 0  | 52  | 158   | 0.99 |
| Children without eczema at baseline | 192 | 5  | 6  | 102 | 305   | 0.92 |
| <b>Total</b>                        |     |    |    |     | 463   |      |

++ positive on both baseline and repeated questionnaires

+- positive on baseline questionnaires only

-+ positive on repeated questionnaires only

-- negative on both baseline and repeated questionnaires

Level of agreement indicated by k:  $\leq 0.4$  poor, 0.41–0.60 moderate, 0.61–0.80 good,  $> 0.8$  excellent
